# Supplementary material for: Chiral Separation of Cannabichromene, Cannabicyclol, and Their Acidic Analogs on Polysaccharide Chiral Stationary Phases
Source: MDPI journal article supplement (doi:10.3390/molecules28031164), 2023-01-24
Supplement: s1 [file s1]

## Supplementary

# Chiral Separation of Cannabichromene, Cannabicyclol, and their Acidic Analogs on Polysaccharide Chiral Stationary Phases

John M. Ferraro <sup>1</sup>, Dr. Weston J. Umstead <sup>1,\*</sup>

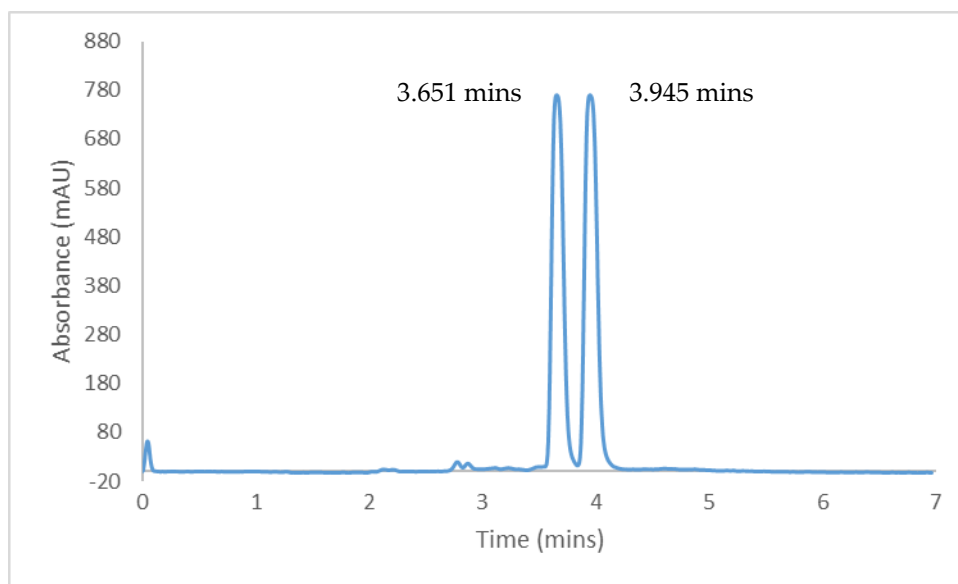

**Figure S1:** Separation of CBC on CHIRALPAK® IB N-3 with Hex-MtBE = 80-20 (v/v)

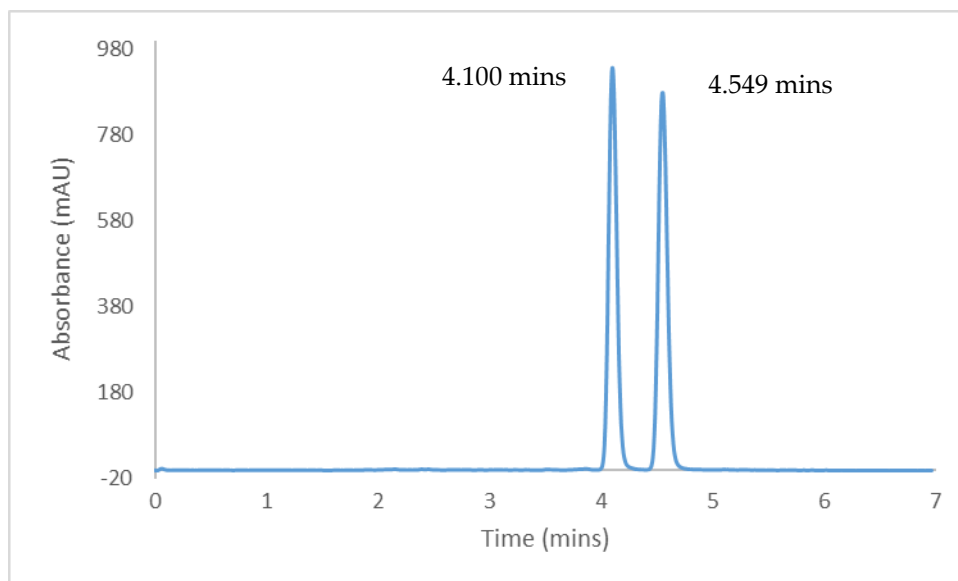

**Figure S2:** Separation of CBC on CHIRALPAK® IB N-3 with Hex-EtOAc = 90-10 (v/v)

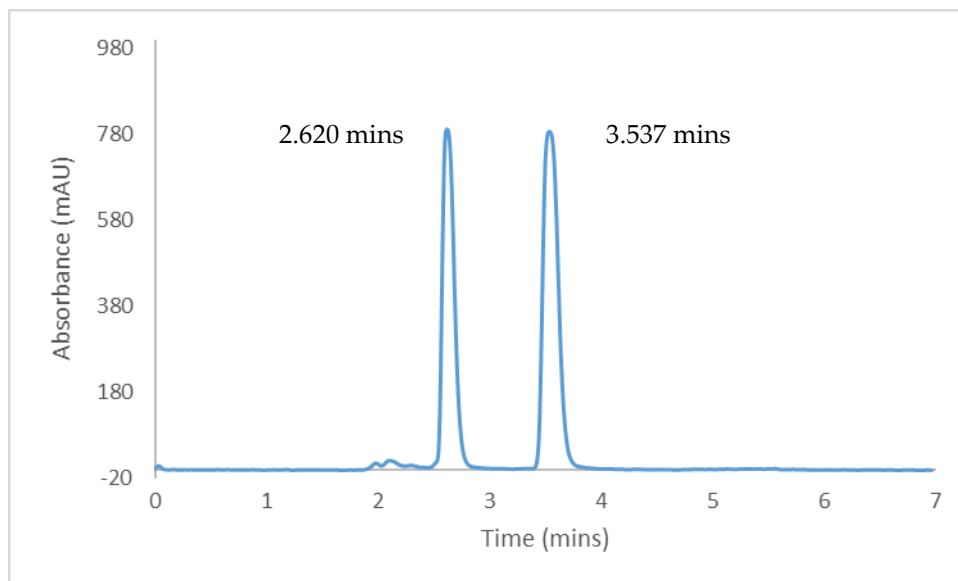

**Figure S3:** Separation of CBC on CHIRALPAK® IC-3 with Hex-MtBE = 80-20 (v/v)

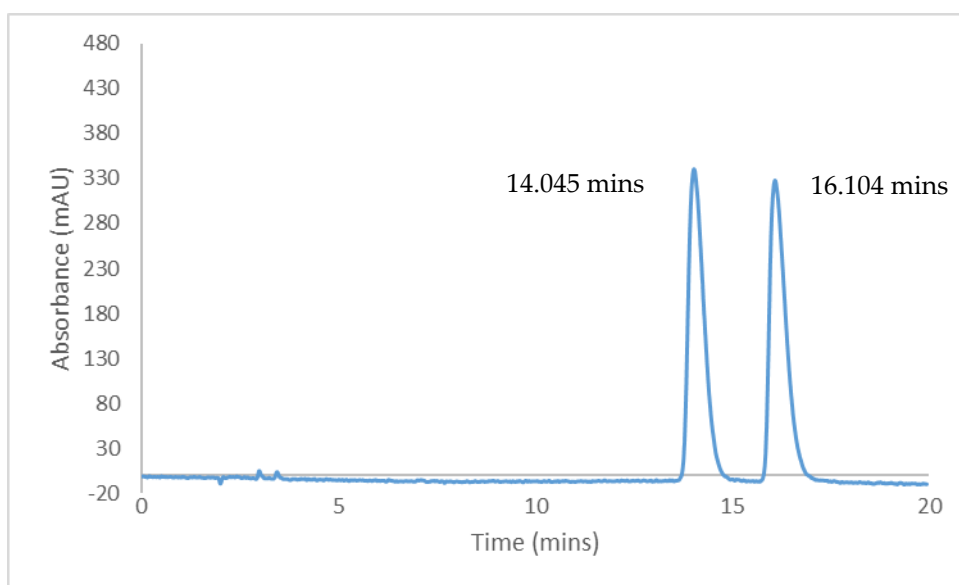

**Figure S4:** Separation of CBC on CHIRALPAK® IG-3 with Hex-DCM = 80-20 (v/v)

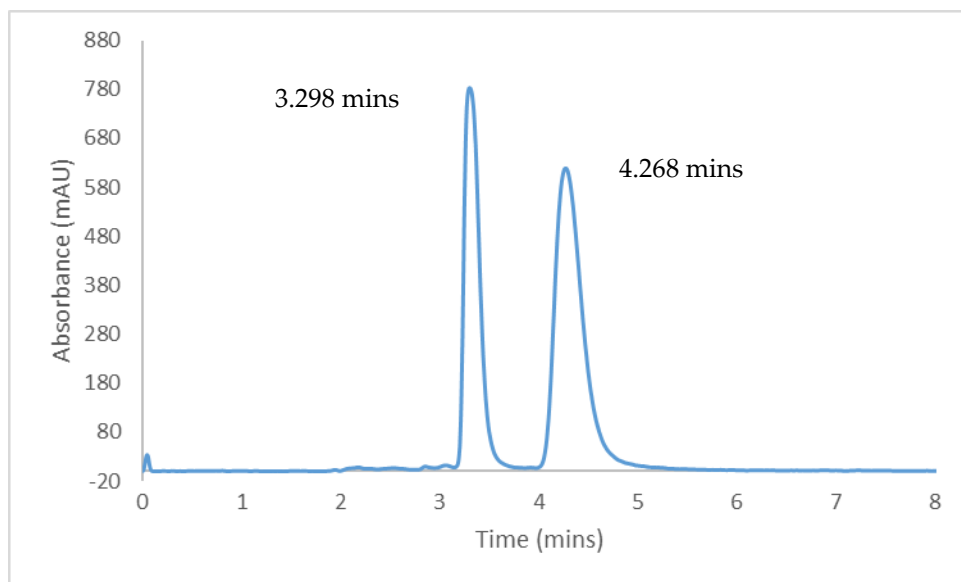

**Figure S5:** Separation of CBC on CHIRALPAK® IG-3 with Hex-MtBE = 80-20 (v/v)

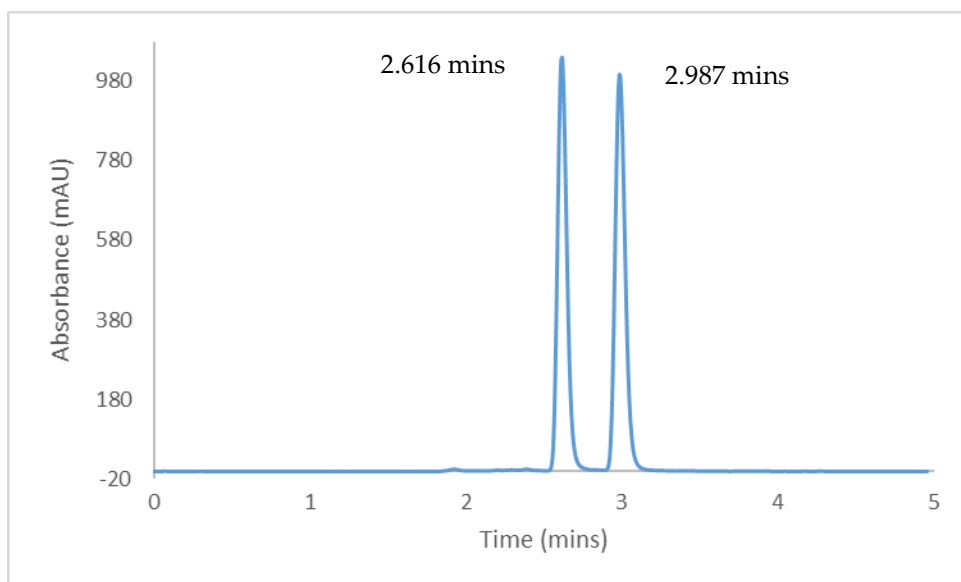

**Figure S6:** Separation of CBC on CHIRALPAK® IK-3 with Hex-EtOAc = 90-10 (v/v)

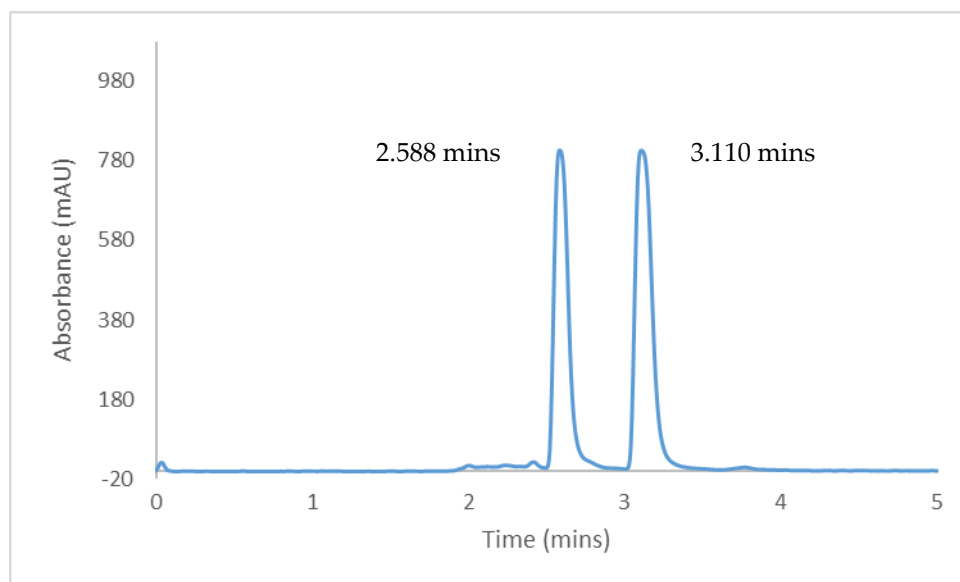

**Figure S7:** Separation of CBC on CHIRALPAK® IK-3 with Hex-MtBE = 80-20 (v/v)

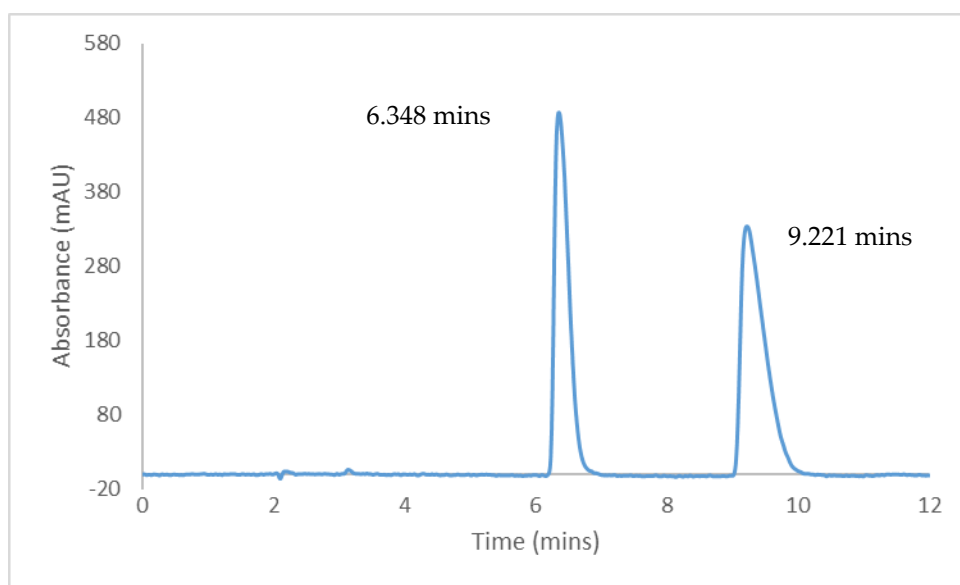

**Figure S8:** Separation of CBC on CHIRALPAK® IC-3 with Hex-DCM = 80-20 (v/v)

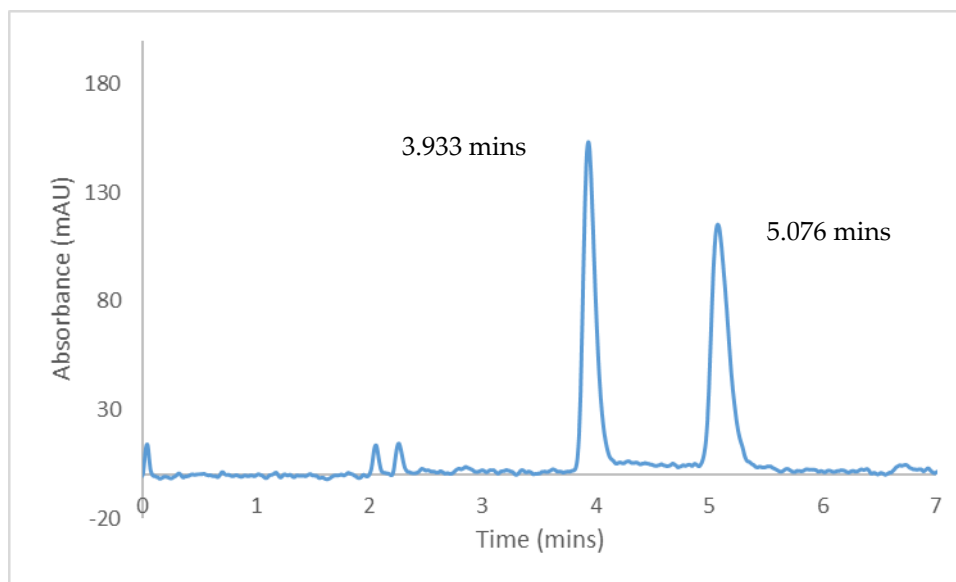

**Figure S9:** Separation of CBA on CHIRALPAK® IC-3 with Hex-DCM-TFA = 80-20-0.1 (v/v/v)

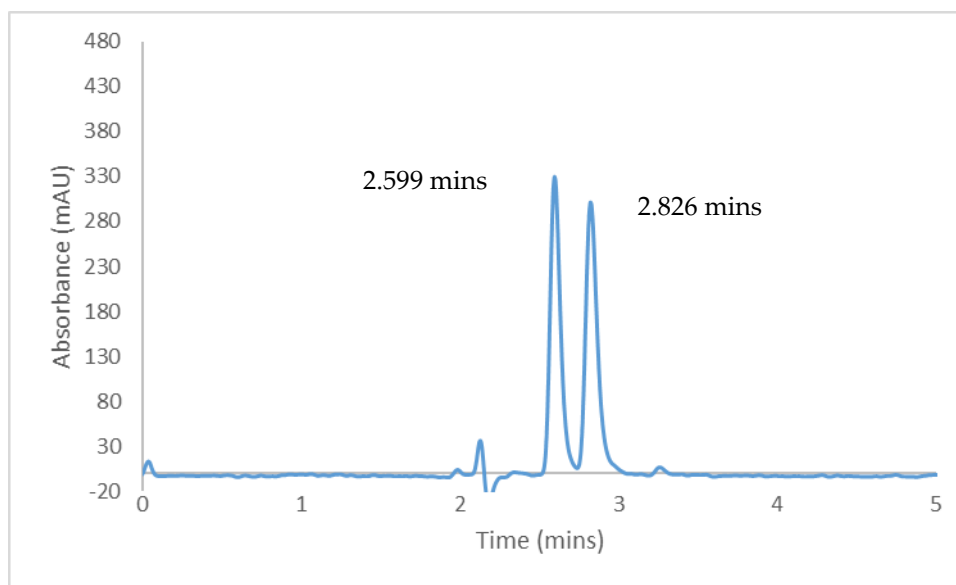

**Figure S10:** Separation of CBA on CHIRALPAK® IK-3 with Hex-MtBE-TFA = 80-20-0.1 (v/v/v)

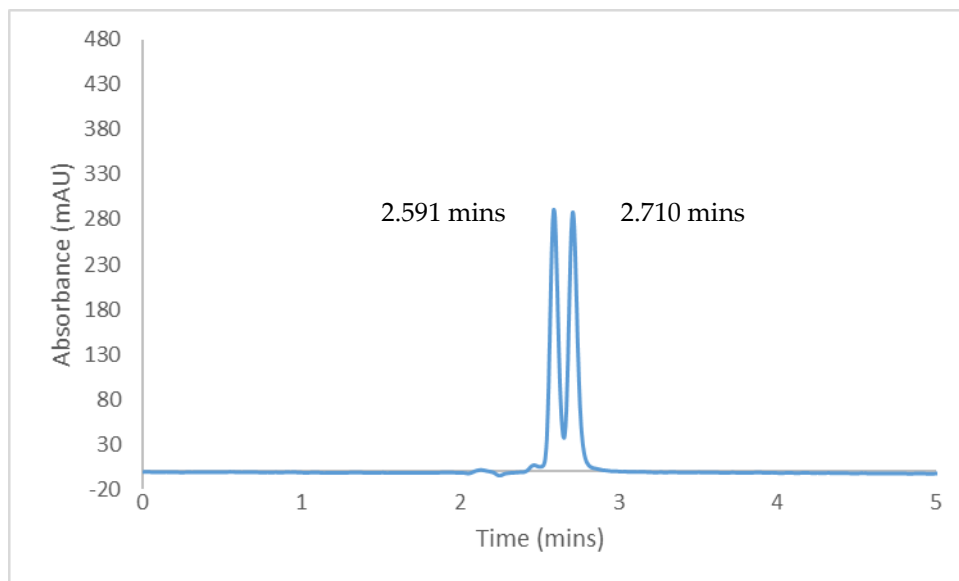

**Figure S11:** Separation of CBCA on CHIRALPAK® IK-3 with Hex-EtOAc-TFA = 90-10-0.1 (v/v/v)

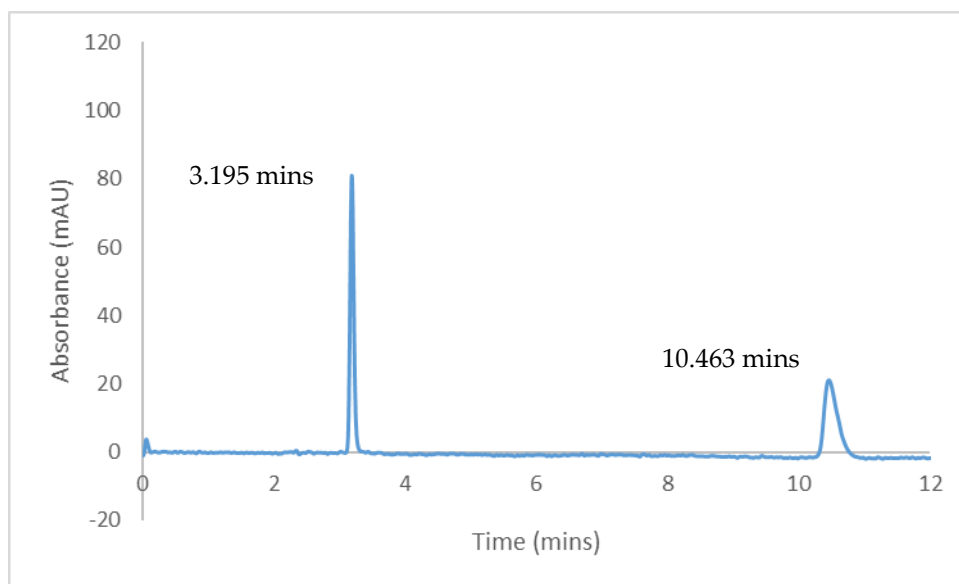

**Figure S12:** Separation of CBL on CHIRALPAK® IBN-3 with Hex-EtOAc = 90-10 (v/v)

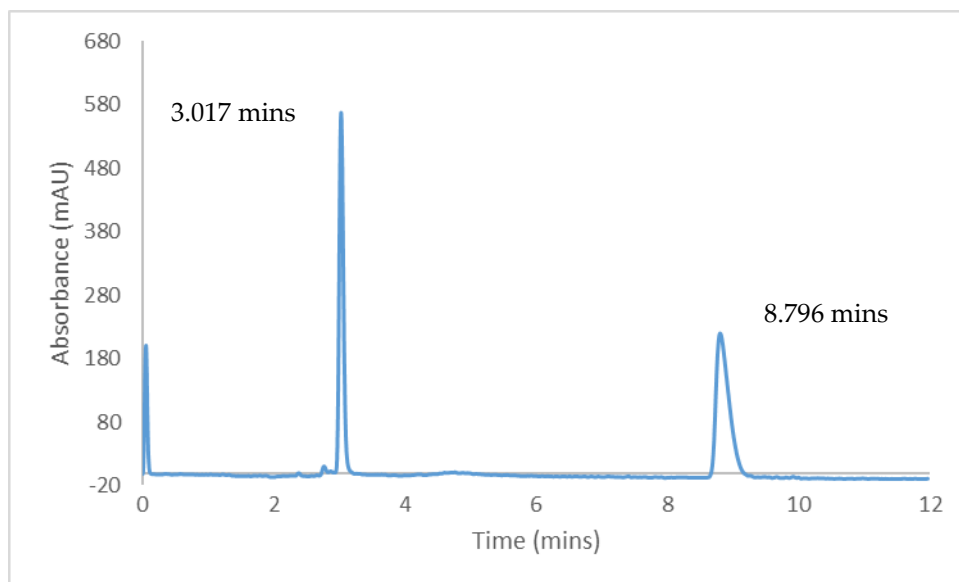

**Figure S13:** Separation of CBL on CHIRALPAK® IBN-3 with Hex-MtBE = 80-20 (v/v)

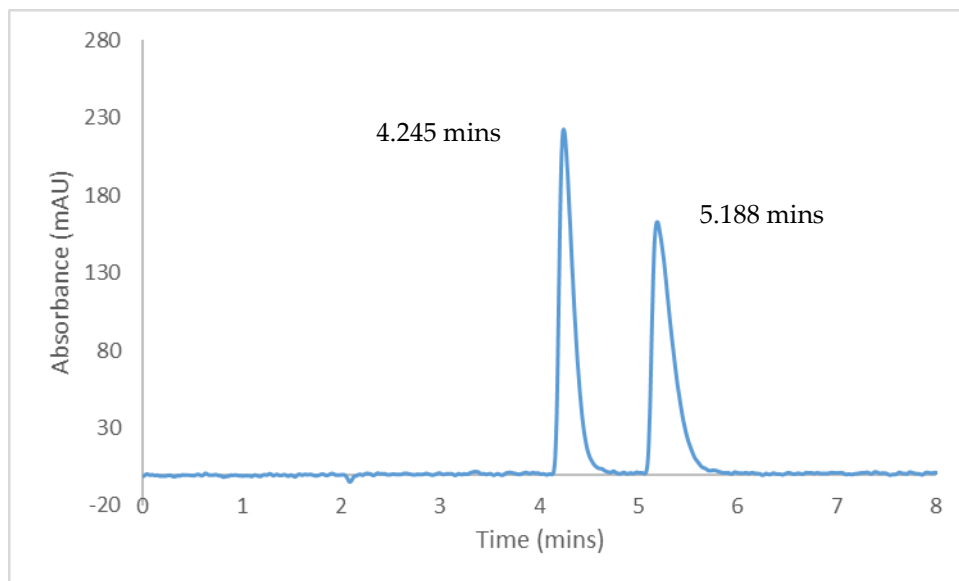

**Figure S14:** Separation of CBL on CHIRALPAK® IC-3 with Hex-DCM = 80-20 (v/v)

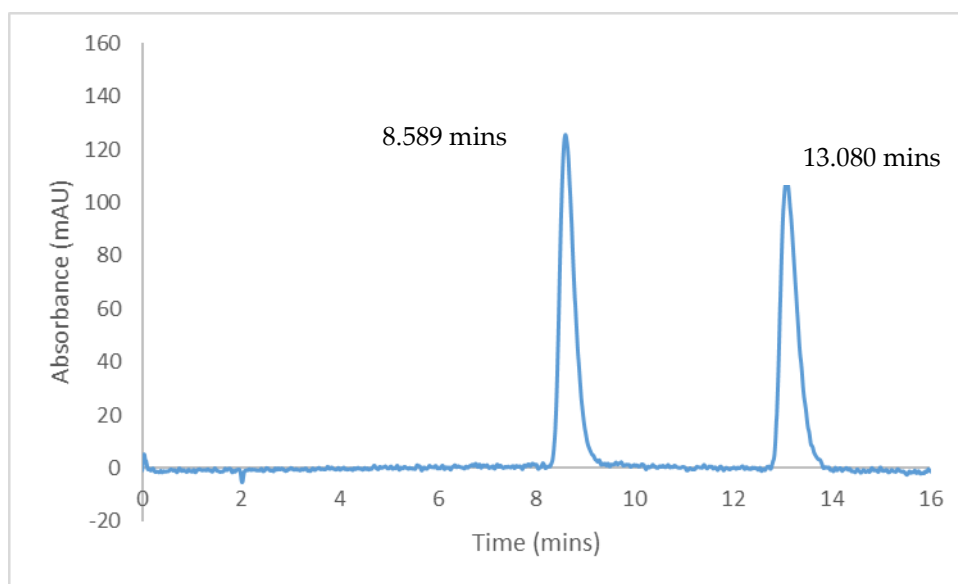

**Figure S15:** Separation of CBL on CHIRALPAK® IG-3 with Hex-DCM = 80-20 (v/v)

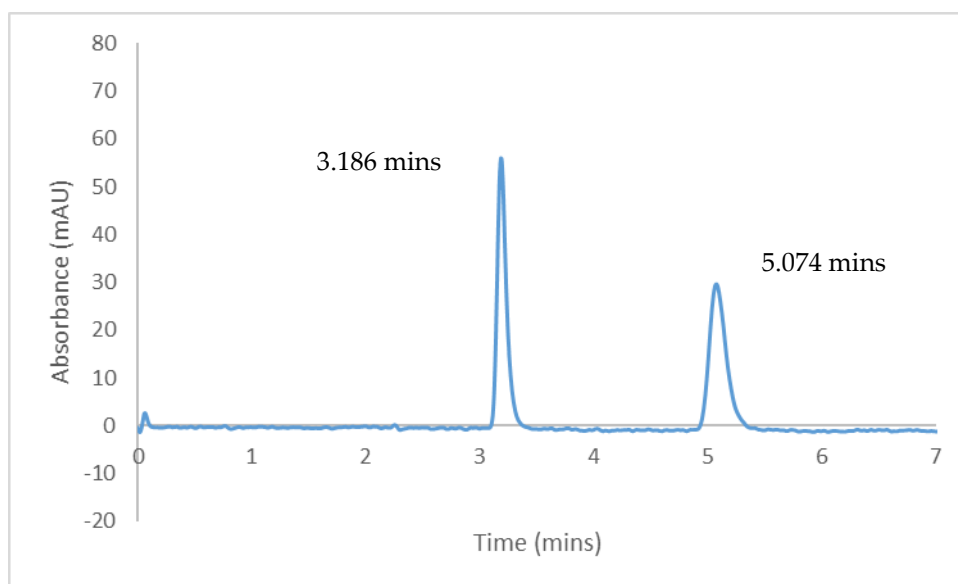

**Figure S16:** Separation of CBL on CHIRALPAK® IG-3 with Hex-EtOAc = 90-10 (v/v)



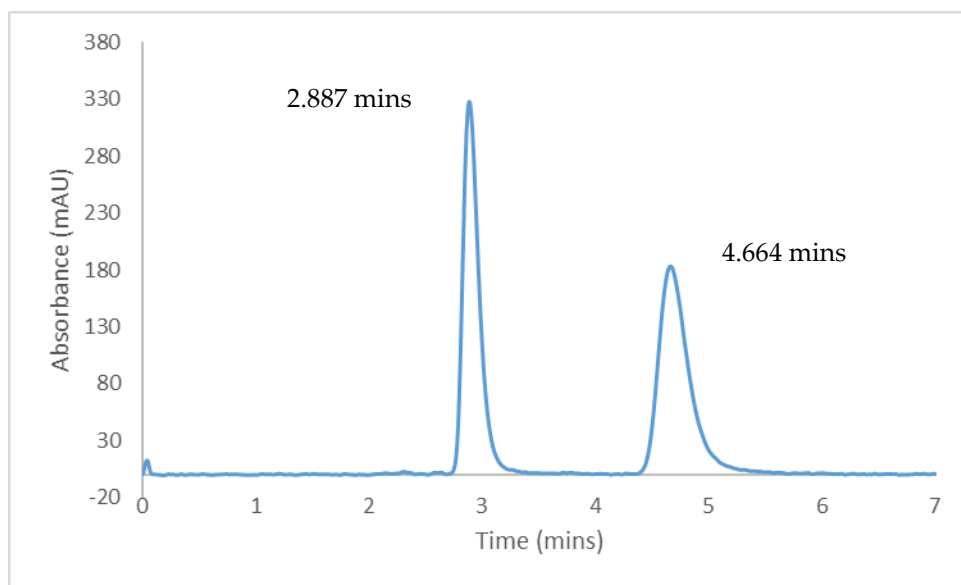

**Figure S17:** Separation of CBL on CHIRALPAK® IG-3 with Hex-MtBE = 80-20 (v/v)

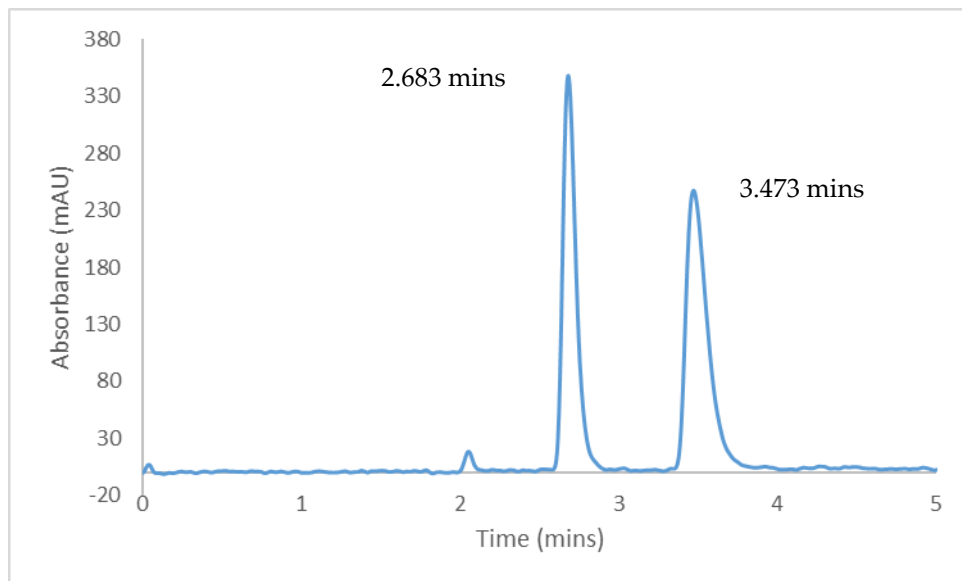

**Figure S18:** Separation of CBLA on CHIRALPAK® IC-3 with Hex-DCM-TFA = 80-20-0.1 (v/v/v)

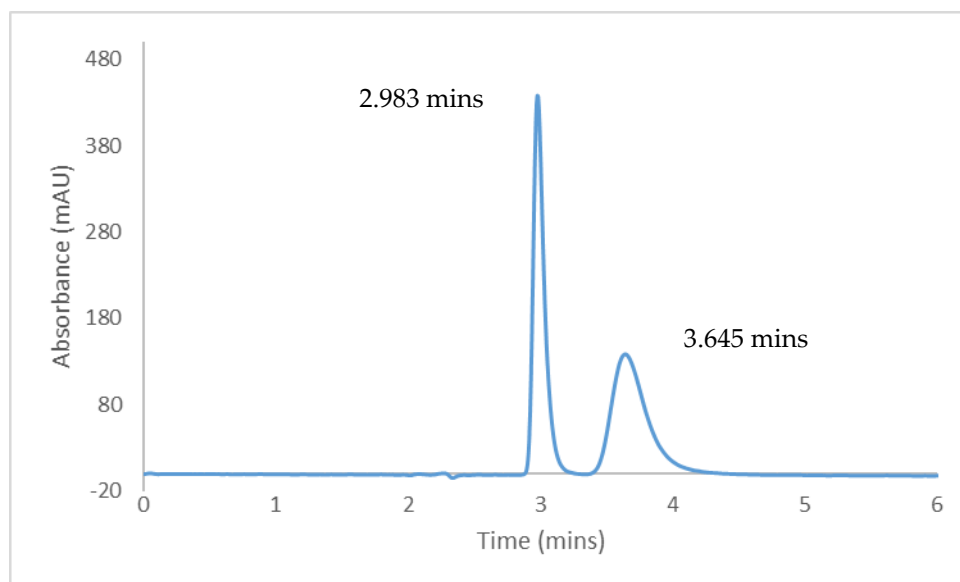

**Figure S19:** Separation of CBLA on CHIRALPAK® IG-3 with Hex-EtOAc-TFA = 90-10-0.1 (v/v/v)

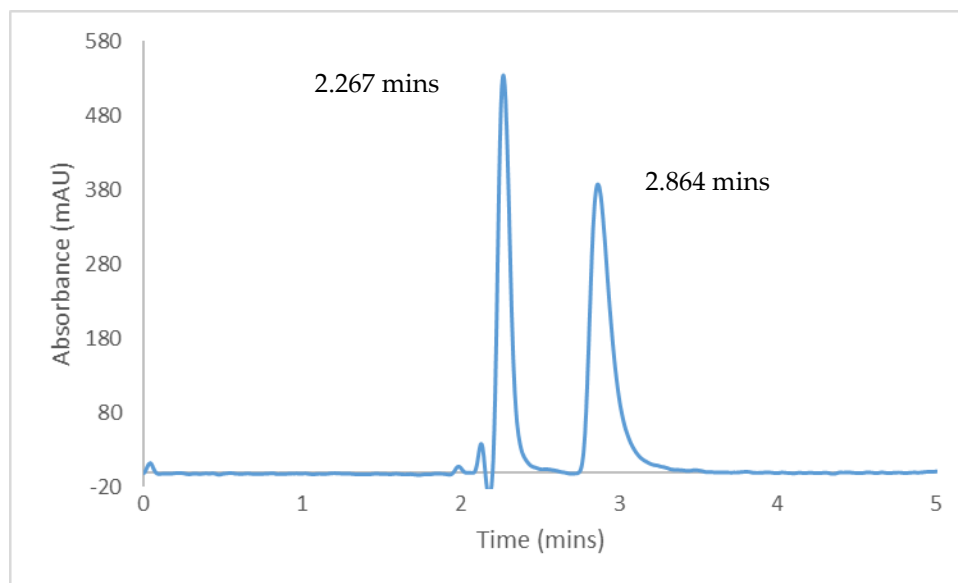

**Figure S20:** Separation of CBLA on CHIRALPAK® IK-3 with Hex-MtBE-TFA = 80-20-0.1 (v/v/v)
